# Supplementary material for: In Vitro and In Vivo Evaluation of Lactobacillus delbrueckii subsp. bulgaricus KLDS1.0207 for the Alleviative Effect on Lead Toxicity
Source: MDPI journal article supplement (doi:10.3390/nu9080845), 2017-08-08
Supplement: s1 [file s1]

**Table S1.** Adsorption constants derived from simulations with different isotherm models.

| Name of isotherm model                                        | Constants       |        |
|---------------------------------------------------------------|-----------------|--------|
| 1、Langmuir                                                    | Q <sub>m</sub>  | 15.47  |
| $q_e = \frac{q_m \times b \times C_e}{1 + b \times C_e}$      | b               | 0.2494 |
|                                                               | R <sup>2</sup>  | 0.9731 |
| 2、Freundlich                                                  | K <sub>F</sub>  | 3.9836 |
| $q_e = K_F \times C_e^{1/n}$                                  | N               | 3.8658 |
|                                                               | R <sup>2</sup>  | 0.8574 |
| 3、Langmuir-Freundlich                                         | K <sub>LF</sub> | 1.9337 |
| $q_e = \frac{K_{LF} \times C_{eq}^{1/n}}{1 + a C_{eq}^{1/n}}$ | A               | 0.1778 |
|                                                               | N               | 1.2500 |
|                                                               | R <sup>2</sup>  | 0.9820 |

q<sub>e</sub> (mg metal/g biosorbent) represents the equilibrium content of the Pb bound by the biomass. C<sub>e</sub> (mg/L) represents the equilibrium Pb concentration.

**Table S2.** Quantitative analysis of EDS.

| <b>Element</b> | <b>Weight (%)</b> | <b>Atomic (%)</b> |
|----------------|-------------------|-------------------|
| C              | 66.22             | 85.43             |
| O              | 13.39             | 12.97             |
| Au             | 18.95             | 1.49              |
| Pb             | 1.45              | 0.11              |

C, carbon; O, oxygen; Au, gold; and Pb, lead.

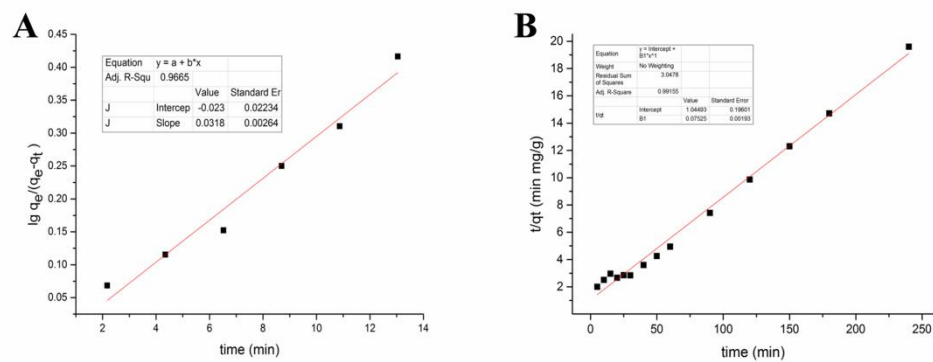

**Figure S1.** Kinetic models of the Pb binding by *L. bulgaricus* KLDS1.0207: (A) Pseudo first-order kinetic model of the Pb binding by *L. bulgaricus* KLDS1.0207 in the first 15 min; and (B) Pseudo second-order kinetic model of the Pb binding by *L. bulgaricus* KLDS1.0207.
